# Supplementary material for: Clinical relevance of CD70 expression in resected pancreatic cancer: prognostic value and therapeutic potential
Source: Research Square preprint supplement (doi:10.21203/rs.3.rs-86059/v1), 2020-10-07
Supplement: Supplementary file 1 [file 431d1144b1a1818cfcd68f82.docx]

| **Supplementary Table 1** Survival analysis in adjuvant chemotherapy completion cohort | | | | | | | |
| --- | --- | --- | --- | --- | --- | --- | --- |
|  |  | Univariate analysis | | | Multivariate analysis | | |
|  |  | HR | 95% CI | *P* | HR | 95% CI | *P* |
| CA19-9 | ≤37 | 1 |  |  | 1 |  |  |
|  | >38 | 2.04 | 1.25-3.38 | **0.004** | 2.06 | 1.25-3.42 | **0.004** |
| pT (AGCC/UICC) | T1/2 | 1 |  |  | 1 |  |  |
|  | T3/4 | 2.21 | 1.16-4.80 | **0.015** | 2.44 | 1.21-5.59 | **0.011** |
| pN (AGCC/UICC) | N0 | 1 |  |  |  |  |  |
|  | N1 | 1.24 | 0.73-2.04 | 0.415 |  |  |  |
| Resection margin | Free | 1 |  |  | 1 |  |  |
|  | Microscopic residual | 2.00 | 0.96-3.75 | 0.062 | 1.27 | 0.57-2.50 | 0.535 |
| CD70 expression | Low | 1 |  |  | 1 |  |  |
|  | High | 1.74 | 1.04-2.83 | **0.027** | 2.00 | 1.18-3.31 | **0.011** |
